# Supplementary material
Source: PubMed Central journal article supplement (PMC6208056)
Supplement: supp_6.4.E445_2018-0017-1-at.pdf [file supp_6.4.E445_2018-0017-1-at.pdf]

## Appendix 1 (as supplied by the authors)

Table A1: Oral outpatient antibiotic drugs and classes included in the study

| Antibiotic class                             | Antibiotic drug name                                                                        | Most common indication for use |
|----------------------------------------------|---------------------------------------------------------------------------------------------|--------------------------------|
| Penicillin without beta-lactamase inhibitors | Amoxicillin<br>Ampicillin<br>Cloxacillin<br>Penicillin V potassium<br>Pivmecillinam         | Respiratory infections         |
| Penicillin with beta-lactamase inhibitors    | Amoxicillin-clavulanate                                                                     | Respiratory infections         |
| First generation cephalosporins              | Cefadroxil<br>Cephalexin                                                                    | Skin infections                |
| Second/third generation cephalosporins       | Cefaclor<br>Cefdinir<br>Cefixime<br>Cefpodoxime<br>Cefprozil<br>Ceftibuten<br>Cefuroxime    | Respiratory infections         |
| Second generation fluoroquinolones           | Gemifloxacin<br>Ciprofloxacin<br>Norfloxacin<br>Ofloxacin                                   | Urinary infections             |
| Third generation fluoroquinolones            | Levofloxacin<br>Moxifloxacin                                                                | Respiratory infections         |
| Macrolides                                   | Azithromycin<br>Clarithromycin<br>Erythromycin<br>Spiramycin<br>Telithromycin               | Respiratory infections         |
| Trimethoprim and/or sulphonamides            | Sulfamethoxazole<br>Sulfamethoxazole-trimethoprim<br>Sulfisoxazole<br>Trimethoprim          | Urinary infections             |
| Tetracyclines                                | Doxycycline<br>Minocycline<br>Tetracycline                                                  | Other                          |
| Lincosomides                                 | Clindamycin                                                                                 | Skin infections                |
| Nitrofurantoin                               | Nitrofurantoin                                                                              | Urinary infections             |
| Metronidazole                                | Metronidazole                                                                               | Other                          |
| Others                                       | Rifabutin<br>Rifampin<br>Fidaxomicin<br>Fosfomicin<br>Linezolid<br>Methenamine<br>Tedizolid | Other                          |

|  |            |  |
|--|------------|--|
|  | Vancomycin |  |
|--|------------|--|

Table A2: Crude and adjusted incidence rate ratios for antibiotic prescriptions per 1000 population per year using a multivariable Poisson model with Generalized Estimating Equation and 95% confidence intervals calculated with bootstrapped simulations.

| Variable                               | Crude IRR (95% CI) | Adjusted IRR (95% CI) |
|----------------------------------------|--------------------|-----------------------|
| Health Region                          |                    |                       |
| Type III test (Chi-square; p-value)    | 11.72; 0.5507      | 21.73; 0.0597         |
| Central                                | 1.17 (0.96-1.43)   | 1.16 (0.95-1.42)      |
| Central East                           | 1.14 (0.93-1.41)   | 1.12 (0.94-1.33)      |
| Central West                           | 1.22 (0.95-1.56)   | 1.23 (0.96-1.57)      |
| Champlain                              | Reference          | Reference             |
| Erie St. Clair                         | 1.46 (1.07-1.98)   | 1.44 (1.1-1.89)       |
| Hamilton Niagara Haldimand Brant       | 1.26 (1.03-1.55)   | 1.16 (0.99-1.36)      |
| Mississauga                            | 1.39 (1.03-1.87)   | 1.38 (1.08-1.75)      |
| North East                             | 1.14 (0.85-1.51)   | 1.15 (0.93-1.43)      |
| North Simcoe                           | 1.01 (0.67-1.51)   | 1.03 (0.81-1.3)       |
| North West                             | 1.23 (0.73-2.05)   | 1.16 (0.72-1.85)      |
| South East                             | 1.09 (0.77-1.55)   | 1.19 (0.99-1.43)      |
| South West                             | 1.1 (0.85-1.44)    | 1.13 (0.94-1.36)      |
| Toronto Central                        | 1.06 (0.82-1.36)   | 0.92 (0.75-1.13)      |
| Waterloo Wellington                    | 1.03 (0.8-1.32)    | 0.99 (0.83-1.19)      |
| Rural area                             | 0.44 (0.39-0.5)    | 0.45 (0.38-0.53)      |
| Urban area                             | Reference          | Reference             |
| FSA physician characteristics          |                    |                       |
| Family physicians:specialists*         | 0.92 (0.89-0.94)   | 0.97 (0.95-1.00)      |
| Male physicians*                       | 1.05 (0.99-1.10)   | 1 (0.95-1.06)         |
| Physician career stage                 |                    |                       |
| Early career physicians*               | 0.99 (0.93-1.05)   | 1 (0.96-1.04)         |
| Middle career physicians*              | 1.05 (1.01-1.10)   | 1.05 (1-1.1)          |
| Late career physicians*                | Reference          | Reference             |
| Physician density per 1000 population^ | 1.08 (1.07-1.1)    | 1.09 (1.07-1.11)      |
| FSA population characteristics         |                    |                       |
| Indigenous population*                 | 0.94 (0.84-1.04)   | 1.03 (0.88-1.21)      |
| Immigrant population*                  | 1.16 (1.05-1.28)   | 1.00 (0.94-1.06)      |
| Low income population*                 | 1.03 (0.99-1.06)   | 0.97 (0.85-1.10)      |
| Male <18 years*                        | 0.97 (0.88-1.08)   | 1.08 (0.98-1.20)      |
| Females <18 years*                     | 0.68 (0.51-0.92)   | 0.19 (0.03-1.17)      |
| Males 18-64 years*                     | 0.68 (0.50-0.93)   | 2.04 (0.38-11.07)     |
| Females 18-64 years*                   | 1.03 (0.80-1.31)   | 0.86 (0.49-1.49)      |
| Males ≥65 years*                       | 1.28 (0.87-1.86)   | 0.53 (0.23-1.24)      |
| Females ≥65 years*                     | 0.99 (0.75-1.32)   | 0.58 (0.16-2.14)      |

IRR = incidence rate ratio; CI = confidence interval; FSA=Forward Sortation Area; \*per 10% increase; ^per 1% increase
