# Supplementary material
Source: PubMed Central journal article supplement (PMC6208056)
Supplement: supp_6.4.E445_original-submission.pdf [file supp_6.4.E445_original-submission.pdf]

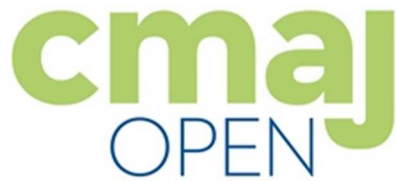

## A Cross-Sectional Study of Regional Variability in Outpatient Antibiotic Use in Ontario, Canada

|                               |                                                                                                                                                                                                                                                                                                                                                                                                                                                                                                                                                                                                                                                                                                                                                                                                                                                                                                                                                                                                                                                                                                                                                                           |
|-------------------------------|---------------------------------------------------------------------------------------------------------------------------------------------------------------------------------------------------------------------------------------------------------------------------------------------------------------------------------------------------------------------------------------------------------------------------------------------------------------------------------------------------------------------------------------------------------------------------------------------------------------------------------------------------------------------------------------------------------------------------------------------------------------------------------------------------------------------------------------------------------------------------------------------------------------------------------------------------------------------------------------------------------------------------------------------------------------------------------------------------------------------------------------------------------------------------|
| Journal:                      | <i>CMAJ Open</i>                                                                                                                                                                                                                                                                                                                                                                                                                                                                                                                                                                                                                                                                                                                                                                                                                                                                                                                                                                                                                                                                                                                                                          |
| Manuscript ID                 | CMAJOpen-2018-0017                                                                                                                                                                                                                                                                                                                                                                                                                                                                                                                                                                                                                                                                                                                                                                                                                                                                                                                                                                                                                                                                                                                                                        |
| Manuscript Type:              | Cross-sectional                                                                                                                                                                                                                                                                                                                                                                                                                                                                                                                                                                                                                                                                                                                                                                                                                                                                                                                                                                                                                                                                                                                                                           |
| Date Submitted by the Author: | 25-Jan-2018                                                                                                                                                                                                                                                                                                                                                                                                                                                                                                                                                                                                                                                                                                                                                                                                                                                                                                                                                                                                                                                                                                                                                               |
| Complete List of Authors:     | Schwartz, Kevin; Public Health Ontario, ; University of Toronto Dalla Lana School of Public Health,<br>Achon, Camille; Ontario Agency for Health Protection and Promotion, Surveillance and Epidemiology<br>Brown, Kevin; Public Health Ontario, Infection Prevention and Control; University of Toronto Dalla Lana School of Public Health<br>Langford, Bradley; Public Health Ontario<br>Daneman, Nick; Sunnybrook Health Sciences Centre, University of Toronto, Medicine; Public Health Ontario; University of Toronto Department of Medicine<br>Johnstone, Jennie; Public Health Ontario, Infection Prevention and Control; University of Toronto Dalla Lana School of Public Health<br>Garber, Gary; Public Health Ontario, Infection Prevention and Control; University of Toronto Department of Medicine; Ottawa Hospital Research Institute                                                                                                                                                                                                                                                                                                                      |
| Keywords:                     | Infectious diseases, Public health                                                                                                                                                                                                                                                                                                                                                                                                                                                                                                                                                                                                                                                                                                                                                                                                                                                                                                                                                                                                                                                                                                                                        |
| More Detailed Keywords:       | Antimicrobial Stewardship, Ontario, Antibiotic use                                                                                                                                                                                                                                                                                                                                                                                                                                                                                                                                                                                                                                                                                                                                                                                                                                                                                                                                                                                                                                                                                                                        |
| Abstract:                     | <p>Background: Antimicrobial resistance is an urgent public health crisis. The largest modifiable driver of antimicrobial resistance is antibiotic use. Our objectives were to benchmark outpatient antibiotic use in the province of Ontario and describe the geographic variability.</p> <p>Methods: This was a cross-sectional study of antibiotics dispensed from retail pharmacies in Ontario, Canada between March 2016 and February 2017. We analyzed variability in number of antibiotics dispensed per 1000 population among Ontario's 14 health regions with crude and adjusted Poisson regression models fitted using generalized estimating equations, to account for regional clustering. Multivariable models were adjusted for rurality, physician density, proportion of generalist physicians, proportion of male physicians, and physician career stage.</p> <p>Results: There were 8,352,578 antibiotics dispensed or 621 per 1000 population. The most common antibiotic classes were narrow-spectrum penicillins, macrolides, first generation cephalosporins, and second generation fluoroquinolones, with wide patient age and sex differences</p> |

1  
2  
3  
4  
5  
6  
7  
8  
9  
10  
11  
12  
13  
14  
15  
16  
17  
18  
19  
20  
21  
22  
23  
24  
25  
26  
27  
28  
29  
30  
31  
32  
33  
34  
35  
36  
37  
38  
39  
40  
41  
42  
43  
44  
45  
46  
47  
48  
49  
50  
51  
52  
53  
54  
55  
56  
57  
58  
59  
60

|  |                                                                                                                                                                                                                                                                                                                                                                                                                                                                                                                                                                                                                                                                                                                                                                  |
|--|------------------------------------------------------------------------------------------------------------------------------------------------------------------------------------------------------------------------------------------------------------------------------------------------------------------------------------------------------------------------------------------------------------------------------------------------------------------------------------------------------------------------------------------------------------------------------------------------------------------------------------------------------------------------------------------------------------------------------------------------------------------|
|  | <p>observed. There was significant geographic variability in total and class specific use. The highest use health region dispensed 778 antibiotics compared to the lowest use region with 533 per 1000 population. The crude and adjusted incidence rate ratios for the highest use region compared to the lowest use region were 1.46 (95%CI 1.07-1.98) and 1.49 (95%CI 1.15-1.93), respectively.</p> <p>Interpretation: We defined baseline antibiotic usage in Ontario over a 12 month period. There was significant variability between health regions that persisted after multivariable adjustment. This variability suggests important opportunities for interventions to optimize antibiotic use and slow the emergence of antimicrobial resistance.</p> |
|  |                                                                                                                                                                                                                                                                                                                                                                                                                                                                                                                                                                                                                                                                                                                                                                  |

SCHOLARONE™  
Manuscripts

Confidential

## A Cross-Sectional Study of Regional Variability in Outpatient Antibiotic Use in Ontario, Canada

**Authors:** Kevin L. Schwartz<sup>1,2</sup> MD MSc, Camille Achonu<sup>1</sup> MHSc, Kevin Antoine Brown<sup>1,2</sup> PhD, Bradley Langford<sup>1</sup> PharmD, Nick Daneman<sup>1,3,4</sup> MD MSc, Jennie Johnstone<sup>1,2</sup> MD PhD, Gary Garber<sup>1,4,5</sup> MD

1. Public Health Ontario, 480 University Ave Suite 300, Toronto ON, M5G 1V2
2. Dalla Lana School of Public Health, University of Toronto, ON
3. Sunnybrook Health Sciences Centre, University of Toronto, ON
4. Department of Medicine, University of Toronto, ON
5. Ottawa Hospital Research Institute, Ottawa, ON

### Corresponding Author:

Kevin L. Schwartz

Email: [kevin.schwartz@oahpp.ca](mailto:kevin.schwartz@oahpp.ca)

**Funding Statement:** This study was funded by Public Health Ontario

**Competing interests:** none

### Contributor's Statement:

All authors contributed substantially to the conception and design of the study. In addition, CA performed the analysis and KS drafted the manuscript. All authors critically revised the manuscript. All authors provided final approval for submission and agreed to act as guarantors for the work.

## Abstract

Background: Antimicrobial resistance is an urgent public health crisis. The largest modifiable driver of antimicrobial resistance is antibiotic use. Our objectives were to benchmark outpatient antibiotic use in the province of Ontario and describe the geographic variability.

Methods: This was a cross-sectional study of antibiotics dispensed from retail pharmacies in Ontario, Canada between March 2016 and February 2017. We analyzed variability in number of antibiotics dispensed per 1000 population among Ontario's 14 health regions with crude and adjusted Poisson regression models fitted using generalized estimating equations, to account for regional clustering. Multivariable models were adjusted for rurality, physician density, proportion of generalist physicians, proportion of male physicians, and physician career stage.

Results: There were 8,352,578 antibiotics dispensed or 621 per 1000 population. The most common antibiotic classes were narrow-spectrum penicillins, macrolides, first generation cephalosporins, and second generation fluoroquinolones, with wide patient age and sex differences observed. There was significant geographic variability in total and class specific use. The highest use health region dispensed 778 antibiotics compared to the lowest use region with 533 per 1000 population. The crude and adjusted incidence rate ratios for the highest use region compared to the lowest use region were 1.46 (95%CI 1.07-1.98) and 1.49 (95%CI 1.15-1.93), respectively.

Interpretation: We defined baseline antibiotic usage in Ontario over a 12 month period. There was significant variability between health regions that persisted after multivariable adjustment. This variability suggests important opportunities for interventions to optimize antibiotic use and slow the emergence of antimicrobial resistance.

## Background

Antimicrobial resistance is an urgent public health threat. A study from the United Kingdom estimates that deaths from drug-resistant infections will surpass cancer by 2050, resulting in 10 million deaths annually in the absence of significant intervention.(1) Antibiotic use is the most important modifiable risk factor promoting the development of antimicrobial resistance at both the individual patient and population levels.(2, 3) In Canada, approximately 92% of antibiotics are used outside of the acute care hospital setting.(4) In the United States it is estimated that 30% of all antibiotics prescribed in the community are unnecessary.(5) A recent study from Canada identified that almost 50% of Ontario seniors with upper respiratory infections inappropriately receive antibiotics, suggesting there are opportunities to reduce community antibiotic use.(6)

Antimicrobial stewardship programs (ASPs) are an Accreditation Canada Required Organizational Practice in hospitals, however there is no comparable requirement to promote appropriate antibiotic use in the community. The most effective ASP interventions in hospitals have involved direct engagement with prescribers to promote behaviour change.(7) Implementation of these strategies is challenging in a community setting. Simply applying the principles of hospital ASPs to the ambulatory setting is not practical because most family physicians work in small groups or solo practices with no administrative oversight, minimal access to real-time infectious disease or antimicrobial stewardship pharmacy consultation, and limited means to collect or analyze prescribing data. Despite an increasing focus on antimicrobial resistance and stewardship, antibiotic utilization rates have not declined over the last decade.(4, 8, 9)

The ability to measure antibiotic use in the community is a critical step in implementing effective stewardship interventions. Using a proprietary population-based Ontario dataset, our objective was to describe the geographical variability of antibiotic use to inform future community-based interventions.

## Methods

### *Setting and Design*

We performed a 12 month cross-sectional study analyzing outpatient antibiotic use for the entire population of Ontario, Canada between 1 March 2016 and 28 February 2017. We compared antibiotic variability across Ontario's 14 health regions. The health regions are responsible for planning, integrating, and distributing public healthcare funding in Ontario.

### *Data Source*

The antibiotic use data were obtained from antibiotics dispensed by Ontario pharmacies in the GPM™ database from IQVIA (formerly QuintilesIMS). The dataset consists of aggregated antibiotic prescription counts at the level of the Forward Sortation Area (FSA). The FSA is a geographical unit defined by the first three characters in the Canadian postal code. The IQVIA databases are derived from 64% of Ontario prescriptions. IQVIA uses a validated proprietary geospatial algorithm to project antibiotic prescription counts so that they are representative of 100% of the population.(10) Eligible antibiotics include oral

1  
2  
3 systemic antibacterial agents from the J01 class of pharmacologic agents as deemed by the World  
4 Health Organization Anatomical Therapeutic Classification System.(11) Total and 13 class specific  
5 antibiotic prescription counts were grouped as penicillin without beta-lactamase inhibitors, penicillin  
6 with beta-lactamase inhibitors, first generation cephalosporins, second/third generation cephalosporins,  
7 second generation fluoroquinolones, third generation fluoroquinolones, macrolides, trimethoprim  
8 and/or sulphonamides, tetracyclines, lincosomides, nitrofurantoin, metronidazole, and others.  
9

### 11 *Covariates*

12  
13  
14 FSAs were assigned to the health regions in which they were located. When FSA boundaries overlapped  
15 health region boundaries, FSAs were assigned to the health region that included the main population  
16 centre. FSAs without pharmacies were combined with the largest neighbouring FSA. The Xponent™  
17 database from IQVIA was used for physician level covariates including; regional physician density  
18 (number of physicians per 1000 population), proportion of generalist physicians (family doctors divided  
19 by all physicians), proportion of male physicians, proportion of physicians in early career stage (<11  
20 years), mid-career stage (11-24 years), and late career stage (>24 years). Rural versus urban areas were  
21 defined by the middle number in the FSA of the dispensing pharmacy.(12)  
22  
23

### 24 *Statistical analysis*

25  
26  
27 We presented antibiotic use by number of dispensed prescriptions per 1000 population for total and  
28 class specific antibiotics. Patient age and sex differences were evaluated by Chi-Squared tests. Statistical  
29 comparisons between health regions were performed using Poisson regression models. Between health  
30 region differences were evaluated with incidence rate ratios (IRRs) and 95% confidence intervals (CIs).  
31 The lowest using region was set as the reference. For Crude estimates, we used generalized estimating  
32 equation (GEE) models with an exchangeable correlation matrix that accounted for clustering amongst  
33 FSAs. For the adjusted multivariable models we used GEE including the covariates of rurality, physician  
34 density, proportion of generalist physicians, proportion of male physicians, and proportion of early, mid,  
35 or late career stage physicians. Counts were offset by the logarithm of the population size. Multivariable  
36 models were stratified by antibiotic class as well as patient age and sex (all patients, males <18 years,  
37 females <18 years, males 18-64 years, females 18-64 years, males ≥65 years, females ≥65 years).  
38 Statistical significance was defined as  $p < 0.05$ . Statistical analyses were performed in SAS Version 9.3  
39 (SAS Institute, Cary, NC). This study has research ethics board approval from Public Health Ontario.  
40  
41  
42  
43

### 44 **Results**

45  
46  
47 There were 8,352,578 antibiotics dispensed during the 12 month study period, or 621 antibiotics per  
48 1000 population. The population age and sex distribution was similar between health regions (Table 1).  
49 Narrow spectrum penicillins, macrolides, first generation cephalosporins, and 2<sup>nd</sup> generation  
50 fluoroquinolones were the most frequently prescribed antibiotic classes. There was significant variability  
51 by patient age and sex, with females ≥65 years of age receiving 985 per 1000 population compared to  
52 adult males 18-64 years who received 441 antibiotics per 1000 population ( $P < 0.001$ ). Approximately  
53 80% of all antibiotics to children <18 years were drugs most commonly used for respiratory indications  
54 (most commonly narrow spectrum penicillins and macrolides) while elderly women predominately  
55  
56  
57  
58  
59  
60

1  
2  
3 received urinary agents (nitrofurantoin, second generation fluoroquinolones, and trimethoprim and/or  
4 sulphonamides). Fluoroquinolones comprised 17%, 20%, 9%, 10%, 0.4%, and 0.2% of all antibiotics in  
5 females  $\geq 65$  years, males  $\geq 65$  years, females 18-64 years, males 18-64 years, females  $< 18$  years, and  
6 males  $< 18$  years, respectively (Figure 1).  
7  
8

9 We observed significant geographical variability in antibiotic use between health regions. The three  
10 highest use regions used 778, 742, and 673 antibiotics per 1000 population, compared to the three  
11 lowest using regions with 549, 537, and 534 per 1000 population (Figure 2). There was also substantial  
12 variability between the health regions in high-risk antibiotic use, including lincosamides,  
13 fluoroquinolones, and 2<sup>nd</sup>/3<sup>rd</sup> generation cephalosporins (Figure 3).  
14  
15

16 In the regression models the highest use region (Erie St. Clair) had a crude and adjusted IRR of 1.46  
17 (95%CI 1.07-1.98) and 1.49 (95%CI 1.15-1.93), respectively. Significant variability persisted in most  
18 regions after adjustment for regional differences in physician characteristics, and stratification by  
19 patient age and sex (Table 2).  
20  
21

## 22 Interpretation

23 We identified significant geographical variability in antibiotic use amongst Ontario's 14 health regions,  
24 which persisted after adjustment for patient and physician factors. This variability was not explained by  
25 population differences suggesting opportunities for intervention.  
26  
27  
28

29 Antibiotic use data in Canada from 1995 to 2010 showed a modest decline suggesting some success in  
30 public and provider awareness of rising antimicrobial resistance.(13, 14) However, a recent analysis of  
31 antibiotic use in Ontario seniors shows stable usage over the past decade.(9) In the United States  
32 similar data have been used to identify substantial inter-state antibiotic use variability. Overall the  
33 United States uses 833 antibiotics per 1000 population with some of the Southern states using twice the  
34 amount compared to the North West. Ontario uses a similar amount of outpatient antibiotics to the  
35 lowest using states,(15) but substantially more than many European countries.(16) It is noteworthy that  
36 variability in antibiotic use persists within a province at the smaller health region level. We identified  
37 important differences in antibiotic use amongst patient age and sex strata. These differences were  
38 partially explained by the higher use of nitrofurantoin, second generation fluoroquinolones, and  
39 trimethoprim and/or sulphonamides, likely reflecting antibiotic prescribing for urinary infections.  
40 However inter-regional variability persisted in most patient age and sex strata supporting our hypothesis  
41 that this variability cannot be explained by population differences. This raises the possibility that this  
42 variability could be driven by physician behaviour and amenable to interventions of peer-comparison  
43 feedback.  
44  
45  
46  
47  
48

49 The explanations for variability in antibiotic use are complex. There are a number of potential  
50 contributing factors that include patient complexity, patient expectations, socioeconomic status,  
51 remoteness, physician access, as well as both patient and physician knowledge. In this study we  
52 incorporated some regional variables that account for population and healthcare access differences. A  
53 number of studies have suggested that prescriber factors are the key driver of higher antibiotic use.  
54 Several Canadian studies have identified physician practice type, practice volume, later career stage, and  
55  
56  
57  
58  
59  
60

1  
2  
3 prior prescribing patterns as significant predictors of high or inappropriate antibiotic use.(17-19)  
4 Similarly, a study from a large Veteran Affairs population in the United States showed that certain  
5 providers tended to prescribe antibiotics for acute respiratory infection visits, while others did not,  
6 independent of patient and location factors.(20) Therefore, observed geographical variability may be  
7 explained by physician prescribing behaviours being more similar between physicians in close proximity  
8 than those in different health regions. Further study evaluating this observation would be of interest.  
9  
10

11 Overuse of antibiotics has multiple downstream and long-term public health implications. Numerous  
12 studies have identified the association of antibiotic use and resistance, at both an ecological and  
13 individual patient levels.(2, 3) Studies from the United States have identified the importance of  
14 geographic variability of antibiotic use on resistance rates of *Streptococcus pneumoniae* as well as  
15 community-associated *Clostridium difficile* infections.(21, 22) Furthermore, it is estimated that there are  
16 four emergency department visits for adverse drug events for every 1000 individuals, with antibiotics  
17 representing one of the most common culprits.(23) Inappropriate inpatient antibiotic use has been  
18 directly associated with adverse patient outcomes, highlighting antimicrobial stewardship as an  
19 important patient safety program.(24)  
20  
21  
22  
23

24 The identification of geographical variability has implications for community interventions. A potential  
25 provincial strategy could be to initiate a stewardship program targeting the highest prescribers where  
26 the greatest yield is expected.(25) However, overuse of antibiotics is likely by most prescribers in all  
27 regions, and there would be expected benefit as a result of population-wide interventions. There was  
28 variability in use of high risk antibacterial agents, such as fluoroquinolones. Health Canada recently  
29 issued a warning surrounding serious adverse reactions to fluoroquinolones including tendinopathy,  
30 peripheral neuropathy, and central nervous system disorders.(26) Targeting a specific high-risk antibiotic  
31 class represents another opportunity for quality improvement. However, by targeting only high-risk  
32 classes, overall antibiotic use is unlikely to decline due to the *squeezing-of-the-balloon* effect, where use  
33 of alternative antibiotics tend to increase.(27) Multiple studies have been published on a variety of  
34 interventions for outpatient antibiotic use. The best evidence is for communication skills training, point-  
35 of-care diagnostics, and peer-comparison feedback.(25, 28-31) This data supports the need for a  
36 province-wide evidence-based antimicrobial stewardship program, with a strong surveillance  
37 component, to improve the appropriate use of outpatient antibiotics and slow the emergence of drug  
38 resistant infections. Personalized peer-comparison feedback has the greatest potential for significant  
39 reduction in unnecessary antibiotic use, however multiple studies have demonstrated the lack of  
40 sustained impacts, highlighting that successful programs require ongoing data collection, education, and  
41 feedback.(25, 30, 32)  
42  
43  
44  
45  
46  
47

48 This study is unique by assessing population-level antibiotic use of over 13 million people and  
49 demonstrating regional variability after adjustment for regional physician and population differences.  
50 This study has some limitations. This data is based on 50% of Ontario's pharmacies and IQVIA  
51 extrapolates the data to estimate population use. It is possible that estimated antibiotic use was less  
52 precise in certain regions with poorer coverage, however the IQVIA algorithm is a routinely-validated  
53 and patented method to extrapolate available data to 100% coverage.(33) Pharmacy dispensing data  
54 may not accurately represent antibiotic consumption as patient adherence can vary. Covariates in the  
55  
56  
57  
58  
59  
60



1  
2  
3 multivariable models are based on proportions of physician characteristics within a geographic region.  
4 We were unable to account for other potentially important predictors of antibiotic variability such as  
5 patient expectations. We were also unable to assess appropriateness of antibiotic prescribing from this  
6 data as it does not capture patient visits or diagnoses. Other sources of patient-level data will be  
7 required to assess appropriateness.  
8  
9

10 In summary, we have identified significant geographical variability in outpatient antibiotic use among  
11 health regions within Ontario. This data provides an important benchmark for expansion of a provincial  
12 outpatient antimicrobial stewardship program and highlights opportunities for interventions to optimize  
13 antibiotic use.  
14  
15  
16  
17  
18  
19  
20  
21  
22  
23  
24  
25  
26  
27  
28  
29  
30  
31  
32  
33  
34  
35  
36  
37  
38  
39  
40  
41  
42  
43  
44  
45  
46  
47  
48  
49  
50  
51  
52  
53  
54  
55  
56  
57  
58  
59  
60

Confidential

## References

1. O'Neill J. Tackling drug-resistant infections globally: final report and recommendations. London: Wellcome Trust & HM Government. 2016.
2. Costelloe C, Metcalfe C, Lovering A, Mant D, Hay AD. Effect of antibiotic prescribing in primary care on antimicrobial resistance in individual patients: systematic review and meta-analysis. *Bmj*. 2010;340:c2096.
3. Bell BG, Schellevis F, Stobberingh E, Goossens H, Pringle M. A systematic review and meta-analysis of the effects of antibiotic consumption on antibiotic resistance. *BMC infectious diseases*. 2014;14(1):13.
4. Canadian Antimicrobial Resistance Surveillance System 2017 Report. <https://www.canada.ca/en/public-health/services/publications/drugs-health-products/canadian-antimicrobial-resistance-surveillance-system-2017-report-executive-summary.html> (accessed November 14, 2017).
5. Fleming-Dutra KE, Hersh AL, Shapiro DJ, et al. Prevalence of inappropriate antibiotic prescriptions among us ambulatory care visits, 2010-2011. *JAMA*. 2016;315(17):1864-73.
6. Silverman M, Povitz M, Sontrop JM, Li L, Richard L, Cejic S, et al. Antibiotic Prescribing for Nonbacterial Acute Upper Respiratory Infections in Elderly Persons. *Ann Intern Med*. 2017;166(11):765-74.
7. Fishman N. Policy statement on antimicrobial stewardship by the Society for Healthcare Epidemiology of America (SHEA), the Infectious Diseases Society of America (IDSA), and the Pediatric Infectious Diseases Society (PIDS). *Infect Control Hosp Epidemiol*. 2012;33(4):322-7.
8. Glass-Kaastra SK, Finley R, Hutchinson J, Patrick DM, Weiss K, Conly J. Longitudinal surveillance of outpatient beta-lactam antimicrobial use in Canada, 1995 to 2010. *The Canadian journal of infectious diseases & medical microbiology = Journal canadien des maladies infectieuses et de la microbiologie medicale*. 2014;25(2):107-12.
9. Tan C, Graves E, Lu H, Chen A, Li S, K.L. S, et al. A decade of outpatient antimicrobial use in senior residents of Ontario. *CMAJ Open*. 2017;5(4):E878-E85.
10. Boardman C, inventor; IMS Health Incorporated, assignee. System and method for estimating product distribution using a product specific universe. US patent 7,174,304. 6 February 2007.
11. WHO Collaborating Centre for Drug Statistics and Methodology. Guidelines for ATC Classification and DDD Assignment. Available online at: [https://www.whocc.no/filearchive/publications/1\\_2013guidelines.pdf](https://www.whocc.no/filearchive/publications/1_2013guidelines.pdf) (accessed June 21, 2017) Oslo, Norway: WHO, 2003.
12. du Plessis V, Beshiri R, Bollman R, Clemenson H, editors. Definitions of rural. Annual General Meeting of the Canadian Association of Geographers; 2001.
13. Finley R, Glass-Kaastra SK, Hutchinson J, Patrick DM, Weiss K, Conly J. Declines in outpatient antimicrobial use in Canada (1995-2010). *PLoS ONE*. 2013;8(10):e76398.
14. McKay RM, Vrbova L, Fuertes E, Chong M, David S, Dreher K, et al. Evaluation of the Do Bugs Need Drugs? program in British Columbia: Can we curb antibiotic prescribing? *The Canadian journal of infectious diseases & medical microbiology = Journal canadien des maladies infectieuses et de la microbiologie medicale*. 2011;22(1):19-24.
15. Hicks LA, Taylor THJ, Hunkler RJ. U.S. Outpatient Antibiotic Prescribing, 2010. *N Engl J Med*. 2013;368(15):1461-2.
16. Glass-Kaastra SK, Finley R, Hutchinson J, Patrick DM, Weiss K, Conly J. Variation in outpatient oral antimicrobial use patterns among Canadian provinces, 2000 to 2010. *The Canadian journal of infectious diseases & medical microbiology = Journal canadien des maladies infectieuses et de la microbiologie medicale*. 2014;25(2):95-8.

17. Hutchinson JM, Foley RN. Method of physician remuneration and rates of antibiotic prescription. *CMAJ : Canadian Medical Association journal = journal de l'Association medicale canadienne*. 1999;160(7):1013-7.
18. Silverman M, Povitz M, Sontrop JM, Li L, Richard L, Cejic S, et al. Antibiotic Prescribing for Nonbacterial Acute Upper Respiratory Infections in Elderly Persons Antibiotic Prescribing for Nonbacterial AURIs in Elderly Persons. *Annals of Internal Medicine*. 2017.
19. Daneman N, Campitelli MA, Giannakeas V, Morris AM, Bell CM, Maxwell CJ, et al. Influences on the start, selection and duration of treatment with antibiotics in long-term care facilities. *CMAJ : Canadian Medical Association journal = journal de l'Association medicale canadienne*. 2017;189(25):E851-e60.
20. Jones BE, Sauer B, Jones MM, Campo J, Damal K, He T, et al. Variation in Outpatient Antibiotic Prescribing for Acute Respiratory Infections in the Veteran Population: A Cross-sectional Study. *Ann Intern Med*. 2015;163(2):73-80.
21. Hicks LA, Chien YW, Taylor TH, Jr., Haber M, Klugman KP. Outpatient antibiotic prescribing and nonsusceptible *Streptococcus pneumoniae* in the United States, 1996-2003. *Clinical infectious diseases : an official publication of the Infectious Diseases Society of America*. 2011;53(7):631-9.
22. Dantes R, Mu Y, Hicks LA, Cohen J, Bamberg W, Beldavs ZG, et al. Association Between Outpatient Antibiotic Prescribing Practices and Community-Associated *Clostridium difficile* Infection. *Open Forum Infect Dis*. 2015;2(3):ofv113.
23. Shehab N, Lovegrove MC, Geller AI, Rose KO, Weidle NJ, Budnitz DS. US Emergency Department Visits for Outpatient Adverse Drug Events, 2013-2014. *Jama*. 2016;316(20):2115-25.
24. Tamma PD, Avdic E, Li DX, Dzintars K, Cosgrove SE. Association of Adverse Events With Antibiotic Use in Hospitalized Patients. *JAMA Intern Med*. 2017;177(9):1308-15.
25. Hallsworth M, Chadborn T, Sallis A, Sanders M, Berry D, Greaves F, et al. Provision of social norm feedback to high prescribers of antibiotics in general practice: a pragmatic national randomised controlled trial. *The Lancet*. 2016;387(10029):1743-52.
26. FLUOROQUINOLONES - Risk of Disabling and Persistent Serious Adverse Reactions. Available online at: <http://www.healthycanadians.gc.ca/recall-alert-rappel-avis/hc-sc/2017/61900a-eng.php> (accessed October 26, 2017). Health Canada 2017.
27. Hernandez-Santiago V, Marwick CA, Patton A, Davey PG, Donnan PT, Guthrie B. Time series analysis of the impact of an intervention in Tayside, Scotland to reduce primary care broad-spectrum antimicrobial use. *J Antimicrob Chemother*. 2015;70(8):2397-404.
28. Drekonja DM, Filice GA, Greer N, Olson A, MacDonald R, Rutks I, et al. Antimicrobial stewardship in outpatient settings: a systematic review. *Infect Control Hosp Epidemiol*. 2015;36(2):142-52.
29. Meeker D, Linder JA, Fox CR, Friedberg MW, Persell SD, Goldstein NJ, et al. Effect of behavioral interventions on inappropriate antibiotic prescribing among primary care practices: a randomized clinical trial. *Jama*. 2016;315(6):562-70.
30. Linder JA, Meeker D, Fox CR, Friedberg MW, Persell SD, Goldstein NJ, et al. Effects of Behavioral Interventions on Inappropriate Antibiotic Prescribing in Primary Care 12 Months After Stopping Interventions. *Jama*. 2017;318(14):1391-2.
31. Tonkin-Crine SK, Tan PS, van Hecke O, Wang K, Roberts NW, McCullough A, et al. Clinician-targeted interventions to influence antibiotic prescribing behaviour for acute respiratory infections in primary care: an overview of systematic reviews. *Cochrane Database Syst Rev*. 2017;9:Cd012252.
32. Gerber JS, Prasad PA, Fiks AG, Localio AR, Bell LM, Keren R, et al. Durability of benefits of an outpatient antimicrobial stewardship intervention after discontinuation of audit and feedback. *Jama*. 2014;312(23):2569-70.

1  
2  
3  
4  
5  
6  
7  
8  
9  
10  
11  
12  
13  
14  
15  
16  
17  
18  
19  
20  
21  
22  
23  
24  
25  
26  
27  
28  
29  
30  
31  
32  
33  
34  
35  
36  
37  
38  
39  
40  
41  
42  
43  
44  
45  
46  
47  
48  
49  
50  
51  
52  
53  
54  
55  
56  
57  
58  
59  
60

33. Fleming-Dutra KE, Bartoces M, Roberts RM, Hicks LA. Characteristics of primary care physicians associated with high outpatient antibiotic prescribing volume. *Open Forum Infectious Diseases*. 2018:ofx279-ofx.

Confidential

**Table 1:** Population demographics in Ontario by health region

| Health region                     | Total population  | < 18 year males (%)   | < 18 year females (%) | 18-64 year males (%)  | 18-64 year females (%) | 65+ year males (%)   | 65+ year females (%) |
|-----------------------------------|-------------------|-----------------------|-----------------------|-----------------------|------------------------|----------------------|----------------------|
| CENTRAL                           | 1,827,890         | 191,365 (10)          | 181,065 (10)          | 562,490 (31)          | 609,595 (33)           | 126,235 (7)          | 157,220 (9)          |
| CENTRAL EAST                      | 1,561,100         | 158,455 (10)          | 151,535 (10)          | 475,115 (30)          | 502,420 (32)           | 122,765 (8)          | 150,585 (10)         |
| CENTRAL WEST                      | 919,600           | 112,690 (12)          | 105,375 (11)          | 288,020 (31)          | 298,230 (32)           | 52,995 (6)           | 62,315 (7)           |
| CHAMPLAIN                         | 1,236,780         | 125,615 (10)          | 120,675 (10)          | 383,865 (31)          | 400,315 (32)           | 93,100 (8)           | 113,355 (9)          |
| ERIE ST. CLAIR                    | 617,100           | 63,680 (10)           | 60,450 (10)           | 186,510 (30)          | 190,150 (31)           | 52,670 (9)           | 63,745 (10)          |
| HAMILTON NIAGARA- HALDIMAND BRANT | 1,384,220         | 137,795 (10)          | 130,605 (9)           | 417,155 (30)          | 433,270 (31)           | 118,805 (9)          | 146,625 (11)         |
| MISSISSAUGA HALTON                | 1,132,555         | 126,690 (11)          | 120,365 (11)          | 353,595 (31)          | 373,260 (33)           | 71,240 (6)           | 87,295 (8)           |
| NORTH EAST                        | 564,460           | 53,035 (9)            | 50,275 (9)            | 170,585 (30)          | 173,615 (31)           | 54,510 (10)          | 62,295 (11)          |
| NORTH SIMCOE MUSKOKA              | 510,945           | 52,220 (10)           | 49,650 (10)           | 155,810 (30)          | 160,175 (31)           | 42,970 (8)           | 50,075 (10)          |
| NORTH WEST                        | 228,195           | 24,125 (11)           | 22,670 (10)           | 69,975 (31)           | 70,190 (31)            | 19,225 (8)           | 22,005 (10)          |
| SOUTH EAST                        | 547,205           | 50,530 (9)            | 48,115 (9)            | 163,910 (30)          | 167,095 (31)           | 54,355 (10)          | 63,080 (12)          |
| SOUTH WEST                        | 970,240           | 101,115 (10)          | 96,455 (10)           | 290,975 (30)          | 298,895 (31)           | 82,750 (9)           | 100,060 (10)         |
| TORONTO CENTRAL                   | 1,186,530         | 94,960 (8)            | 90,475 (8)            | 409,775 (35)          | 424,750 (36)           | 72,005 (6)           | 94,395 (8)           |
| WATERLOO WELLINGTON               | 761,815           | 82,765 (11)           | 78,790 (10)           | 240,950 (32)          | 244,315 (32)           | 51,905 (7)           | 62,930 (8)           |
| <b>TOTAL</b>                      | <b>13,448,635</b> | <b>1,375,040 (10)</b> | <b>1,306,500 (10)</b> | <b>4,168,730 (31)</b> | <b>4,346,275 (32)</b>  | <b>1,015,530 (8)</b> | <b>1,235,980 (9)</b> |

**Table 2:** Regional antibiotic use rate per 1000 population stratified by population age and sex

| Health region                     | Total number of antibiotics | Antibiotic use rate per 1000 population |                 |                   |                  |                    |                |                  |
|-----------------------------------|-----------------------------|-----------------------------------------|-----------------|-------------------|------------------|--------------------|----------------|------------------|
|                                   |                             | Total                                   | < 18 year males | < 18 year females | 18-64 year males | 18-64 year females | 65+ year males | 65+ year females |
| CENTRAL                           | 1,143,402                   | 626                                     | 540             | 558               | 451              | 692                | 852            | 995              |
| CENTRAL EAST                      | 953,269                     | 611                                     | 520             | 546               | 445              | 687                | 773            | 907              |
| CENTRAL WEST                      | 597,585                     | 650                                     | 566             | 562               | 489              | 753                | 885            | 1001             |
| CHAMPLAIN                         | 660,223                     | 534                                     | 392             | 420               | 375              | 621                | 737            | 878              |
| ERIE ST. CLAIR                    | 480,199                     | 778                                     | 733             | 780               | 540              | 880                | 904            | 1110             |
| HAMILTON NIAGARA- HALDIMAND BRANT | 931,476                     | 673                                     | 510             | 552               | 464              | 759                | 878            | 1108             |
| MISSISSAUGA HALTON                | 840,333                     | 742                                     | 593             | 617               | 557              | 843                | 1043           | 1204             |
| NORTH EAST                        | 342,007                     | 606                                     | 466             | 525               | 426              | 712                | 737            | 912              |
| NORTH SIMCOE MUSKOKA              | 274,400                     | 537                                     | 383             | 427               | 363              | 611                | 705            | 925              |
| NORTH WEST                        | 149,335                     | 654                                     | 488             | 574               | 468              | 773                | 784            | 1022             |
| SOUTH EAST                        | 319,482                     | 584                                     | 433             | 509               | 392              | 681                | 724            | 882              |
| SOUTH WEST                        | 571,845                     | 589                                     | 460             | 497               | 394              | 658                | 773            | 1018             |
| TORONTO CENTRAL                   | 671,100                     | 566                                     | 503             | 506               | 397              | 646                | 792            | 887              |
| WATERLOO WELLINGTON               | 417,922                     | 549                                     | 419             | 445               | 388              | 643                | 764            | 920              |
| <b>TOTAL</b>                      | <b>8,352,578</b>            | <b>621</b>                              | <b>508</b>      | <b>537</b>        | <b>441</b>       | <b>706</b>         | <b>817</b>     | <b>985</b>       |

1  
2  
3  
4  
5  
6  
7  
8  
9  
10  
11  
12  
13  
14  
15  
16  
17  
18  
19  
20  
21  
22  
23  
24  
25  
26  
27  
28  
29  
30  
31  
32  
33  
34  
35  
36  
37  
38  
39  
40  
41  
42  
43  
44  
45  
46  
47

Figure 1: Oral antibiotics by drug class per 1000 population in Ontario stratified by patient age and sex

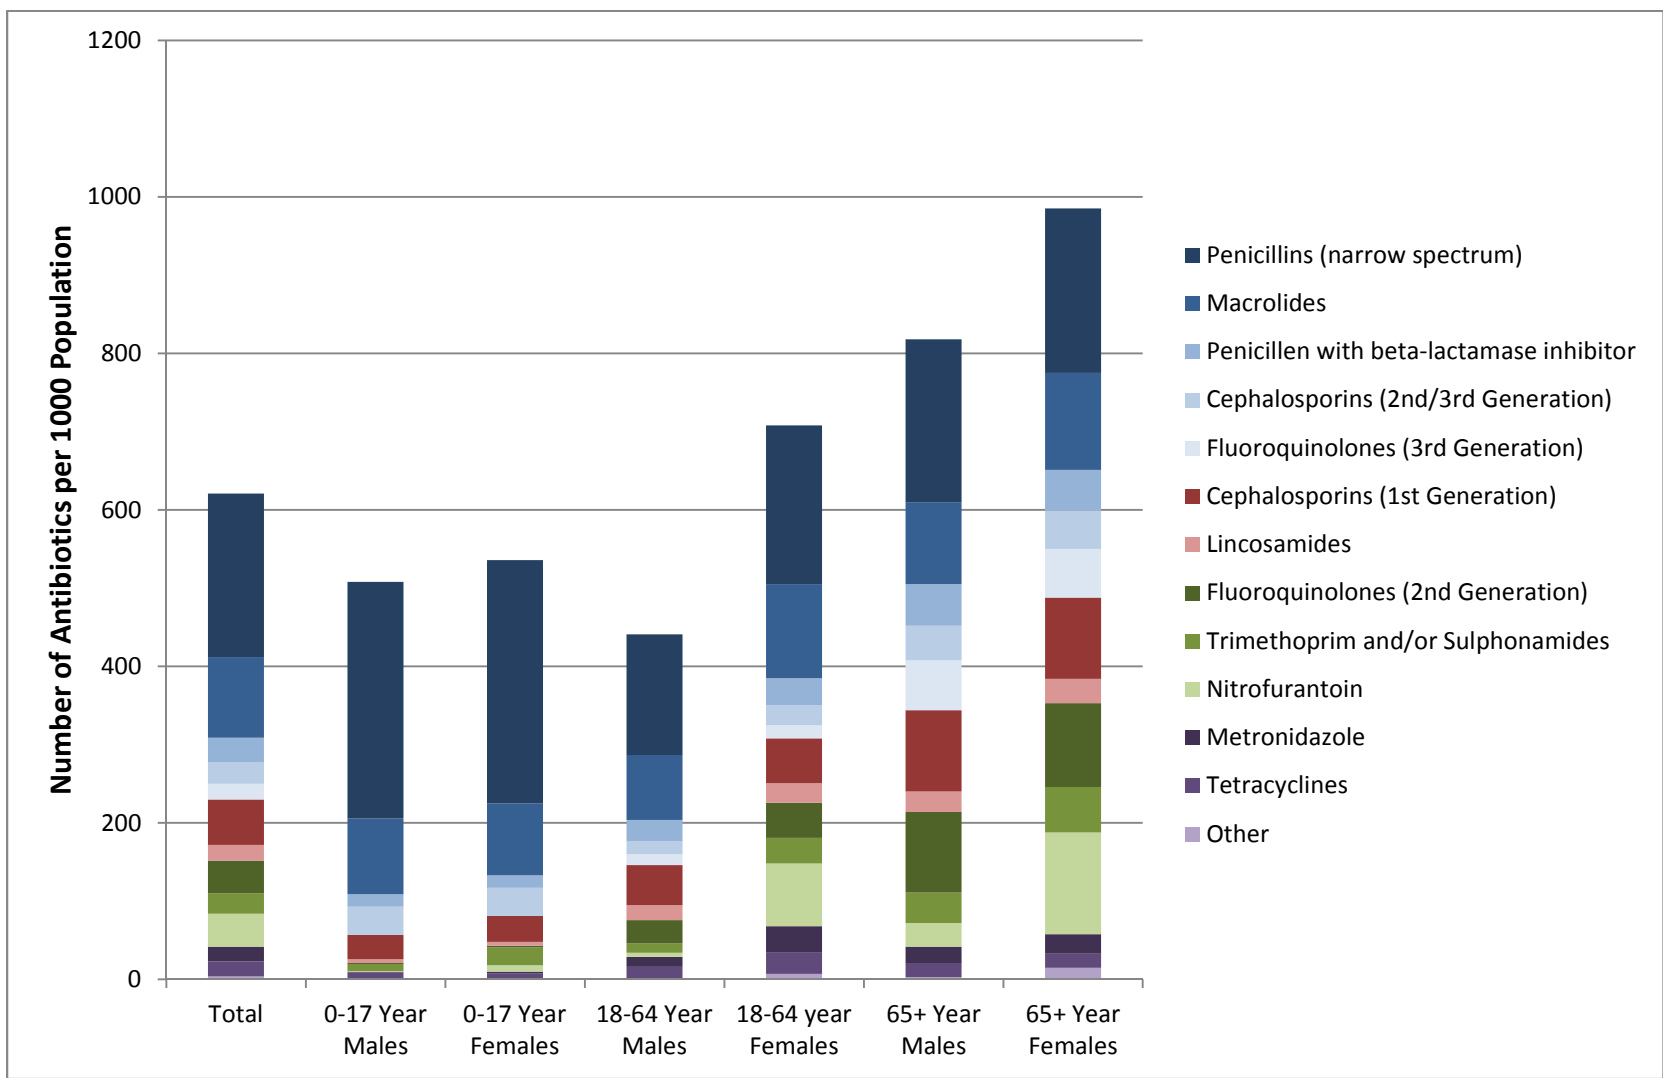

Figure 2: Health region geographic variability in antibiotic use per 1000 population

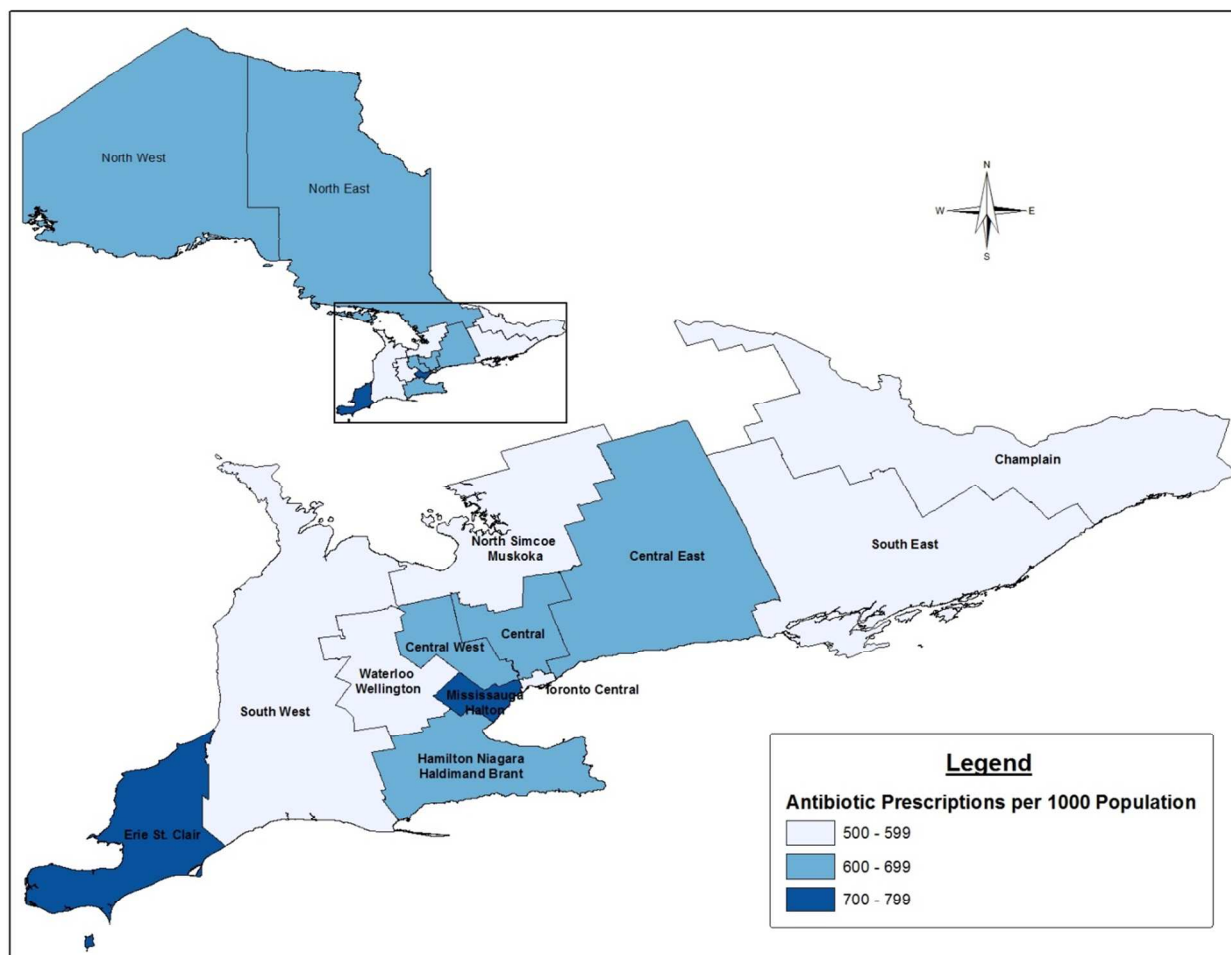

1  
2  
3  
4  
5  
6  
7  
8  
9  
10  
11  
12  
13  
14  
15  
16  
17  
18  
19  
20  
21  
22  
23  
24  
25  
26  
27  
28  
29  
30  
31  
32  
33  
34  
35  
36  
37  
38  
39  
40  
41  
42  
43  
44  
45  
46  
47

Figure 3: Antibiotic use in each health region separated by drug class

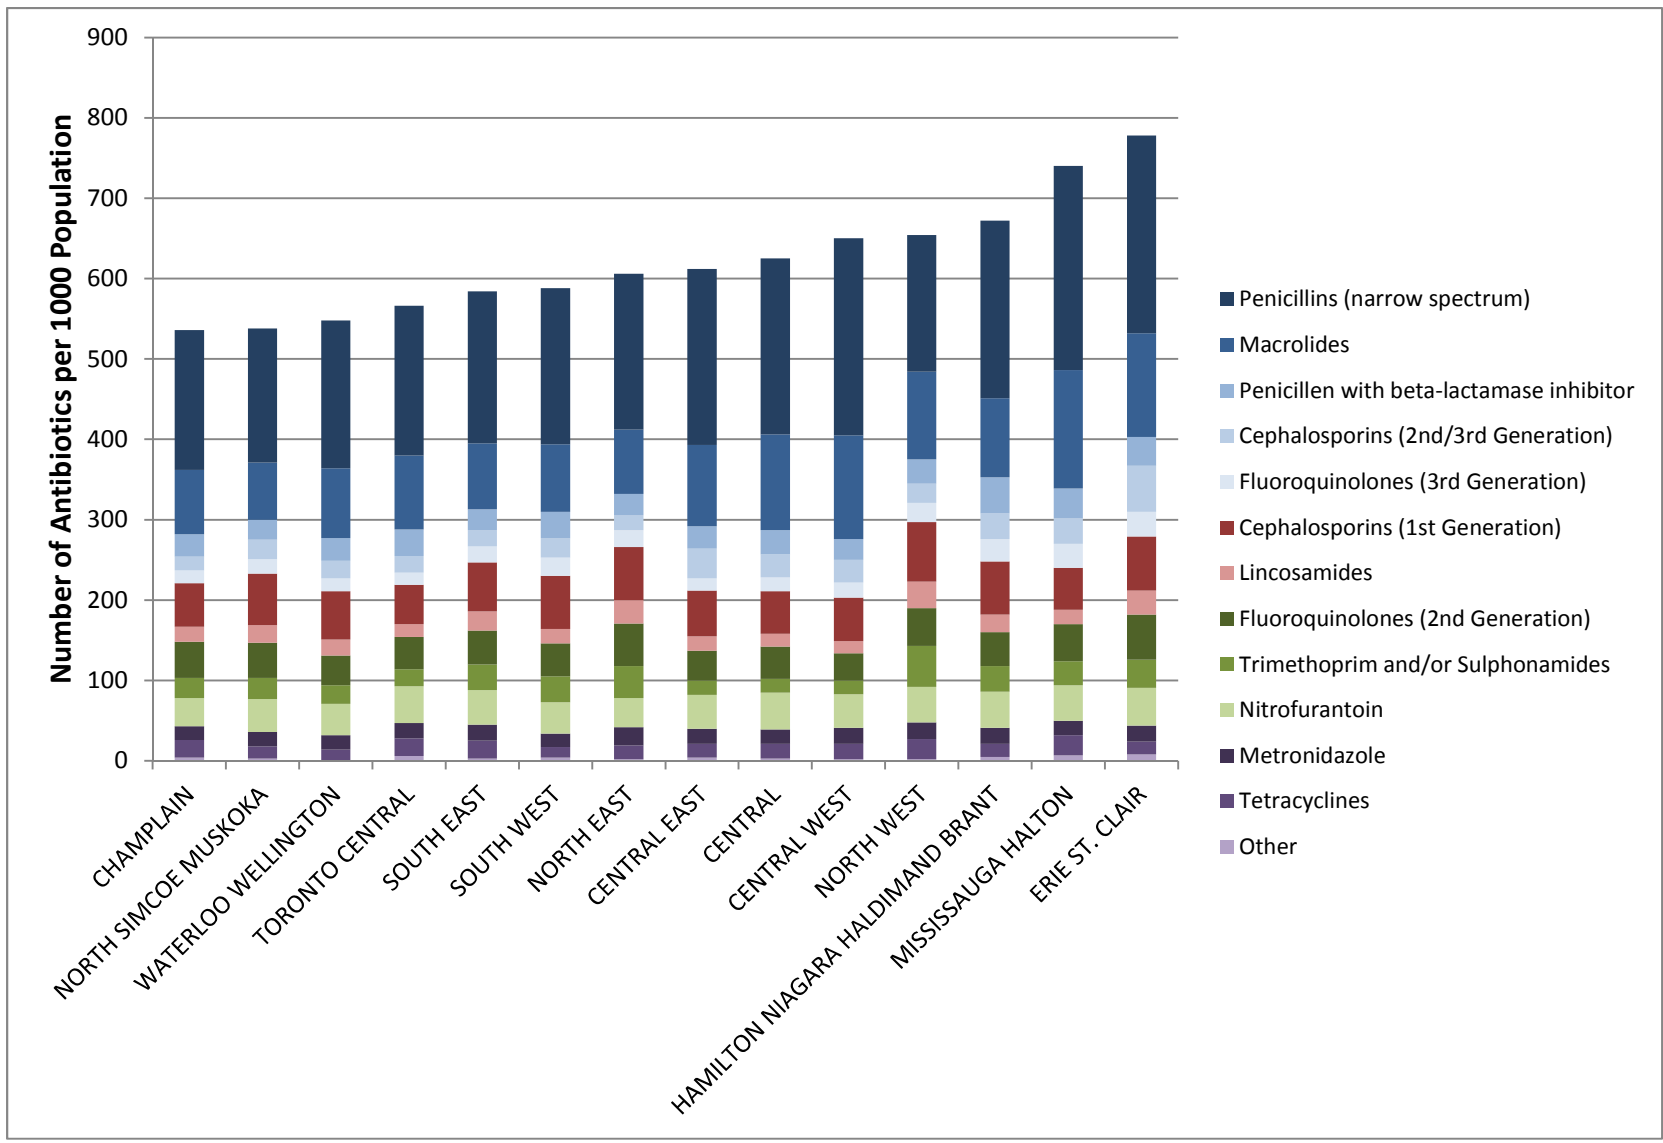



**Table 3:** Crude and adjusted multivariable Poisson regression models, with generalized estimating equations, of antibiotic use amongst Ontario's 14 health regions and stratified by population age and sex.

| Incidence Rate Ratio (95% confidence interval) |           |                  |                  |                  |                  |                    |                  |                  |
|------------------------------------------------|-----------|------------------|------------------|------------------|------------------|--------------------|------------------|------------------|
| Health Region                                  |           | All Patients     | <18 year males   | <18 year females | 18-64 year males | 18-64 year females | 65+ year males   | 65+ year females |
| CENTRAL                                        | Crude     | 1.17 (0.96-1.43) | 1.38 (1.11-1.71) | 1.33 (1.07-1.65) | 1.2 (0.98-1.48)  | 1.11 (0.91-1.37)   | 1.16 (0.94-1.42) | 1.13 (0.91-1.41) |
|                                                | Adjusted* | 1.06 (0.90-1.25) | 1.24 (1.03-1.49) | 1.20 (0.99-1.45) | 1.09 (0.92-1.29) | 1.03 (0.87-1.22)   | 1.03 (0.88-1.22) | 1.03 (0.85-1.26) |
| CENTRAL EAST                                   | Crude     | 1.14 (0.93-1.41) | 1.33 (1.06-1.66) | 1.30 (1.03-1.64) | 1.19 (0.96-1.47) | 1.11 (0.89-1.37)   | 1.05 (0.85-1.30) | 1.03 (0.83-1.29) |
|                                                | Adjusted* | 1.09 (0.92-1.29) | 1.23 (1.02-1.5)  | 1.22 (0.99-1.5)  | 1.12 (0.95-1.33) | 1.07 (0.90-1.28)   | 1.02 (0.86-1.20) | 1.01 (0.83-1.23) |
| CENTRAL WEST                                   | Crude     | 1.22 (0.95-1.56) | 1.44 (1.12-1.85) | 1.34 (1.04-1.72) | 1.31 (1.02-1.68) | 1.21 (0.95-1.56)   | 1.20 (0.93-1.55) | 1.14 (0.87-1.50) |
|                                                | Adjusted* | 1.09 (0.89-1.35) | 1.28 (1.03-1.58) | 1.19 (0.95-1.48) | 1.17 (0.96-1.44) | 1.11 (0.90-1.36)   | 1.06 (0.85-1.32) | 1.02 (0.79-1.31) |
| CHAMPLAIN                                      | Crude     | 1.00             | 1.00             | 1.00             | 1.00             | 1.00               | 1.00             | 1.00             |
|                                                | Adjusted* | 1.00             | 1.00             | 1.00             | 1.00             | 1.00               | 1.00             | 1.00             |
| ERIE ST. CLAIR                                 | Crude     | 1.46 (1.07-1.98) | 1.87 (1.31-2.66) | 1.86 (1.32-2.62) | 1.44 (1.05-1.97) | 1.42 (1.05-1.91)   | 1.23 (0.91-1.66) | 1.26 (0.93-1.72) |
|                                                | Adjusted* | 1.49 (1.15-1.93) | 1.94 (1.43-2.63) | 1.93 (1.43-2.61) | 1.46 (1.13-1.90) | 1.46 (1.13-1.88)   | 1.24 (0.95-1.62) | 1.27 (0.95-1.71) |
| HAMILTON NIAGARA<br>HALDIMAND NORFOLK          | Crude     | 1.26 (1.03-1.55) | 1.3 (1.05-1.61)  | 1.31 (1.07-1.62) | 1.24 (1.01-1.52) | 1.22 (1.00-1.49)   | 1.19 (0.95-1.5)  | 1.26 (0.96-1.65) |
|                                                | Adjusted* | 1.22 (1.04-1.42) | 1.26 (1.07-1.49) | 1.28 (1.08-1.51) | 1.19 (1.02-1.39) | 1.19 (1.02-1.38)   | 1.15 (0.96-1.38) | 1.22 (0.95-1.57) |
| MISSISSAUGA HALTON                             | Crude     | 1.39 (1.03-1.87) | 1.51 (1.15-1.99) | 1.47 (1.11-1.94) | 1.49 (1.10-2.02) | 1.36 (1.01-1.82)   | 1.42 (1.02-1.95) | 1.37 (0.95-1.97) |
|                                                | Adjusted* | 1.24 (0.95-1.6)  | 1.31 (1.03-1.68) | 1.28 (1.00-1.64) | 1.33 (1.02-1.73) | 1.23 (0.95-1.6)    | 1.24 (0.94-1.64) | 1.22 (0.88-1.70) |

1  
2  
3  
4  
5  
6  
7  
8  
9  
10  
11  
12  
13  
14  
15  
16  
17  
18  
19  
20  
21  
22  
23  
24  
25  
26  
27  
28  
29  
30  
31  
32  
33  
34  
35  
36  
37  
38  
39  
40  
41  
42  
43  
44  
45  
46  
47

|                      |           |                  |                  |                  |                  |                  |                  |                  |
|----------------------|-----------|------------------|------------------|------------------|------------------|------------------|------------------|------------------|
| NORTH EAST           | Crude     | 1.14 (0.85-1.51) | 1.18 (0.88-1.59) | 1.24 (0.93-1.67) | 1.13 (0.84-1.51) | 1.14 (0.85-1.53) | 0.99 (0.73-1.34) | 1.03 (0.77-1.38) |
|                      | Adjusted* | 1.31 (1.08-1.57) | 1.39 (1.13-1.72) | 1.46 (1.18-1.81) | 1.3 (1.08-1.56)  | 1.31 (1.08-1.59) | 1.13 (0.94-1.36) | 1.16 (0.93-1.44) |
| NORTH SIMCOE MUSKOKA | Crude     | 1.01 (0.67-1.51) | 0.98 (0.64-1.51) | 1.02 (0.66-1.59) | 0.98 (0.64-1.5)  | 0.99 (0.66-1.49) | 0.97 (0.65-1.44) | 1.06 (0.73-1.55) |
|                      | Adjusted* | 1.06 (0.83-1.35) | 1.03 (0.77-1.38) | 1.07 (0.79-1.46) | 1.03 (0.81-1.31) | 1.04 (0.81-1.34) | 1.01 (0.8-1.28)  | 1.09 (0.83-1.43) |
| NORTH WEST           | Crude     | 1.23 (0.73-2.05) | 1.24 (0.64-2.43) | 1.37 (0.71-2.62) | 1.25 (0.76-2.05) | 1.24 (0.77-2.01) | 1.06 (0.66-1.72) | 1.16 (0.72-1.88) |
|                      | Adjusted* | 1.31 (0.98-1.76) | 1.42 (1.00-2.00) | 1.55 (1.08-2.20) | 1.33 (1.01-1.75) | 1.32 (1.01-1.72) | 1.09 (0.8-1.47)  | 1.19 (0.82-1.73) |
| SOUTH EAST           | Crude     | 1.09 (0.77-1.55) | 1.1 (0.76-1.62)  | 1.21 (0.82-1.78) | 1.05 (0.72-1.52) | 1.10 (0.75-1.60) | 0.98 (0.71-1.35) | 1.01 (0.75-1.36) |
|                      | Adjusted* | 1.30 (1.08-1.56) | 1.34 (1.1-1.64)  | 1.47 (1.20-1.81) | 1.24 (1.02-1.51) | 1.29 (1.07-1.56) | 1.19 (0.98-1.44) | 1.19 (0.95-1.49) |
| SOUTH WEST           | Crude     | 1.10 (0.85-1.44) | 1.17 (0.87-1.58) | 1.18 (0.88-1.59) | 1.05 (0.81-1.36) | 1.06 (0.82-1.37) | 1.05 (0.77-1.42) | 1.16 (0.82-1.64) |
|                      | Adjusted* | 1.16 (0.96-1.4)  | 1.27 (1.04-1.55) | 1.29 (1.05-1.58) | 1.1 (0.92-1.31)  | 1.11 (0.93-1.31) | 1.11 (0.87-1.43) | 1.24 (0.89-1.71) |
| TORONTO CENTRAL      | Crude     | 1.06 (0.82-1.36) | 1.28 (0.93-1.77) | 1.21 (0.89-1.64) | 1.06 (0.83-1.36) | 1.04 (0.80-1.35) | 1.08 (0.83-1.39) | 1.01 (0.78-1.31) |
|                      | Adjusted* | 0.88 (0.73-1.05) | 1.00 (0.81-1.24) | 0.96 (0.77-1.18) | 0.88 (0.73-1.06) | 0.86 (0.71-1.04) | 0.91 (0.74-1.12) | 0.89 (0.71-1.12) |

\*Multivariable models adjusted for health region, rurality, physician density, proportion of family physicians, proportion of male physicians, and proportion of early (<11 years)- vs mid (11-24 years)- vs late (>24 years)-career stage physicians. Reference is the lowest use region (Champlain).

## STROBE Statement—checklist of items that should be included in reports of observational studies

|                              | Item No | Recommendation                                                                                                                                                                                                                                                                                                                                                                                                                                                         | Location in study |
|------------------------------|---------|------------------------------------------------------------------------------------------------------------------------------------------------------------------------------------------------------------------------------------------------------------------------------------------------------------------------------------------------------------------------------------------------------------------------------------------------------------------------|-------------------|
| Title and abstract           | 1       | (a) Indicate the study's design with a commonly used term in the title or the abstract                                                                                                                                                                                                                                                                                                                                                                                 | Page 2 line 3     |
|                              |         | (b) Provide in the abstract an informative and balanced summary of what was done and what was found                                                                                                                                                                                                                                                                                                                                                                    | Page 3            |
| <b>Introduction</b>          |         |                                                                                                                                                                                                                                                                                                                                                                                                                                                                        |                   |
| Background/rationale         | 2       | Explain the scientific background and rationale for the investigation being reported                                                                                                                                                                                                                                                                                                                                                                                   | Page 5 line 5-29  |
| Objectives                   | 3       | State specific objectives, including any prespecified hypotheses                                                                                                                                                                                                                                                                                                                                                                                                       | Page 5 line 32-34 |
| <b>Methods</b>               |         |                                                                                                                                                                                                                                                                                                                                                                                                                                                                        |                   |
| Study design                 | 4       | Present key elements of study design early in the paper                                                                                                                                                                                                                                                                                                                                                                                                                | Page 5 line 41    |
| Setting                      | 5       | Describe the setting, locations, and relevant dates, including periods of recruitment, exposure, follow-up, and data collection                                                                                                                                                                                                                                                                                                                                        | Page 5 line 42    |
| Participants                 | 6       | (a) <i>Cohort study</i> —Give the eligibility criteria, and the sources and methods of selection of participants. Describe methods of follow-up<br><i>Case-control study</i> —Give the eligibility criteria, and the sources and methods of case ascertainment and control selection. Give the rationale for the choice of cases and controls<br><i>Cross-sectional study</i> —Give the eligibility criteria, and the sources and methods of selection of participants | Page 5 line 42-44 |
|                              |         | (b) <i>Cohort study</i> —For matched studies, give matching criteria and number of exposed and unexposed<br><i>Case-control study</i> —For matched studies, give matching criteria and the number of controls per case                                                                                                                                                                                                                                                 |                   |
| Variables                    | 7       | Clearly define all outcomes, exposures, predictors, potential confounders, and effect modifiers. Give diagnostic criteria, if applicable                                                                                                                                                                                                                                                                                                                               | Page 6 line 3-23  |
| Data sources/<br>measurement | 8*      | For each variable of interest, give sources of data and details of methods of assessment (measurement). Describe comparability of assessment methods if there is more than one group                                                                                                                                                                                                                                                                                   | Page 6 line 14-23 |
| Bias                         | 9       | Describe any efforts to address potential sources of bias                                                                                                                                                                                                                                                                                                                                                                                                              | Page 6 line 35-50 |
| Study size                   | 10      | Explain how the study size was arrived at                                                                                                                                                                                                                                                                                                                                                                                                                              | Page 5 line 41    |
| Quantitative<br>variables    | 11      | Explain how quantitative variables were handled in the analyses. If applicable, describe which groupings were chosen and why                                                                                                                                                                                                                                                                                                                                           | Page 6 line 3-23  |
| Statistical methods          | 12      | (a) Describe all statistical methods, including those used to control for confounding                                                                                                                                                                                                                                                                                                                                                                                  | Page 6 line 25    |
|                              |         | (b) Describe any methods used to examine subgroups and interactions                                                                                                                                                                                                                                                                                                                                                                                                    | Page 6 line 39    |

1  
2  
3  
4  
5  
6  
7  
8  
9  
10  
11  
12  
13  
14  
15  
16  
17  
18  
19  
20  
21  
22  
23  
24  
25  
26  
27  
28  
29  
30  
31  
32  
33  
34  
35  
36  
37  
38  
39  
40  
41  
42  
43  
44  
45  
46  
47  
48  
49  
50  
51  
52  
53  
54  
55  
56  
57  
58  
59  
60

---

(c) Explain how missing data were addressed

---

(d) *Cohort study*—If applicable, explain how loss to follow-up was addressed

*Case-control study*—If applicable, explain how matching of cases and controls was addressed

*Cross-sectional study*—If applicable, describe analytical methods taking account of sampling strategy

---

(e) Describe any sensitivity analyses

## Results

---

|              |     |                                                                                                                                                                                                   |                            |
|--------------|-----|---------------------------------------------------------------------------------------------------------------------------------------------------------------------------------------------------|----------------------------|
| Participants | 13* | (a) Report numbers of individuals at each stage of study—eg numbers potentially eligible, examined for eligibility, confirmed eligible, included in the study, completing follow-up, and analysed | Page 6 line 47 and table 1 |
|              |     | (b) Give reasons for non-participation at each stage                                                                                                                                              |                            |
|              |     | (c) Consider use of a flow diagram                                                                                                                                                                |                            |

---

|                  |     |                                                                                                                                          |                              |
|------------------|-----|------------------------------------------------------------------------------------------------------------------------------------------|------------------------------|
| Descriptive data | 14* | (a) Give characteristics of study participants (eg demographic, clinical, social) and information on exposures and potential confounders | Table 1                      |
|                  |     | (b) Indicate number of participants with missing data for each variable of interest                                                      | N/A (population-based study) |
|                  |     | (c) <i>Cohort study</i> —Summarise follow-up time (eg, average and total amount)                                                         |                              |

---

|              |     |                                                                                                      |                              |
|--------------|-----|------------------------------------------------------------------------------------------------------|------------------------------|
| Outcome data | 15* | <i>Cohort study</i> —Report numbers of outcome events or summary measures over time                  |                              |
|              |     | <i>Case-control study</i> —Report numbers in each exposure category, or summary measures of exposure |                              |
|              |     | <i>Cross-sectional study</i> —Report numbers of outcome events or summary measures                   | Page 7 line 9-14 and table 2 |

---

|              |    |                                                                                                                                                                                                              |                               |
|--------------|----|--------------------------------------------------------------------------------------------------------------------------------------------------------------------------------------------------------------|-------------------------------|
| Main results | 16 | (a) Give unadjusted estimates and, if applicable, confounder-adjusted estimates and their precision (eg, 95% confidence interval). Make clear which confounders were adjusted for and why they were included | Page 7 line 16-21 and table 3 |
|              |    | (b) Report category boundaries when continuous variables were categorized                                                                                                                                    |                               |
|              |    | (c) If relevant, consider translating estimates of relative risk into absolute risk for a meaningful time period                                                                                             |                               |

---

|                |    |                                                                                                |                             |
|----------------|----|------------------------------------------------------------------------------------------------|-----------------------------|
| Other analyses | 17 | Report other analyses done—eg analyses of subgroups and interactions, and sensitivity analyses | Figure 1 and 3; and Table 3 |
|----------------|----|------------------------------------------------------------------------------------------------|-----------------------------|

---

## Discussion

---

|                |    |                                                                                                                                                                            |                                  |
|----------------|----|----------------------------------------------------------------------------------------------------------------------------------------------------------------------------|----------------------------------|
| Key results    | 18 | Summarise key results with reference to study objectives                                                                                                                   | Page 7 line 24-27                |
| Limitations    | 19 | Discuss limitations of the study, taking into account sources of potential bias or imprecision. Discuss both direction and magnitude of any potential bias                 | Page 8 line 48- page 9 line 9    |
| Interpretation | 20 | Give a cautious overall interpretation of results considering objectives, limitations, multiplicity of analyses, results from similar studies, and other relevant evidence | Page 7 line 49 to page 8 line 10 |

1  
2  
3  
4  
5  
6  
7  
8  
9  
10  
11  
12  
13  
14  
15  
16  
17  
18  
19  
20  
21  
22  
23  
24  
25  
26  
27  
28  
29  
30  
31  
32  
33  
34  
35  
36  
37  
38  
39  
40  
41  
42  
43  
44  
45  
46  
47  
48  
49  
50  
51  
52  
53  
54  
55  
56  
57  
58  
59  
60

|                  |    |                                                                       |                   |
|------------------|----|-----------------------------------------------------------------------|-------------------|
| Generalisability | 21 | Discuss the generalisability (external validity) of the study results | Page 7 line 29-47 |
|------------------|----|-----------------------------------------------------------------------|-------------------|

---

**Other information**

---

|         |    |                                                                                                                                                               |                |
|---------|----|---------------------------------------------------------------------------------------------------------------------------------------------------------------|----------------|
| Funding | 22 | Give the source of funding and the role of the funders for the present study and, if applicable, for the original study on which the present article is based | Page 3 line 26 |
|---------|----|---------------------------------------------------------------------------------------------------------------------------------------------------------------|----------------|

\*Give information separately for cases and controls in case-control studies and, if applicable, for exposed and unexposed groups in cohort and cross-sectional studies.

**Note:** An Explanation and Elaboration article discusses each checklist item and gives methodological background and published examples of transparent reporting. The STROBE checklist is best used in conjunction with this article (freely available on the Web sites of PLoS Medicine at <http://www.plosmedicine.org/>, Annals of Internal Medicine at <http://www.annals.org/>, and Epidemiology at <http://www.epidem.com/>). Information on the STROBE Initiative is available at [www.strobe-statement.org](http://www.strobe-statement.org).

Confidential
