# Supplementary material
Source: PubMed Central journal article supplement (PMC6208056)

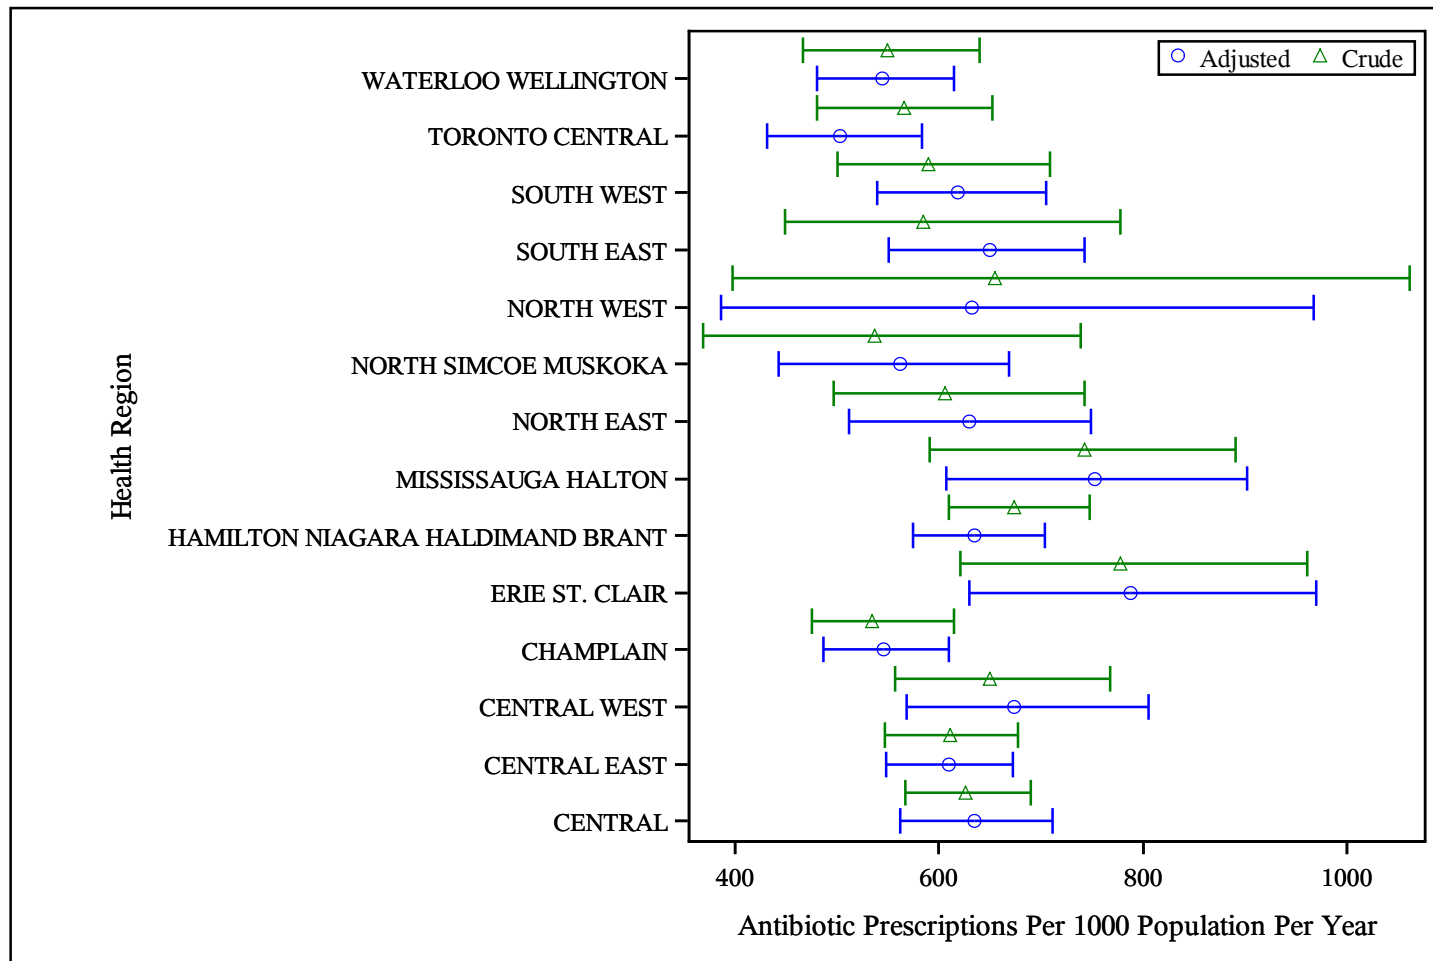

Supplement: supp_6.4.E445_rate_graph.pdf [file supp_6.4.E445_rate_graph.pdf]
